# Supplementary material for: The Intersection of a Child’s Demographics and Household Socioeconomic Status in the Multimorbidity of Malaria, Anaemia, and Malnutrition among Children Aged 6–59 Months in Nigeria
Source: MDPI journal article supplement (doi:10.3390/ijerph21050645), 2024-05-19
Supplement: s1 [file s1]

### *Supplementary file S1*

*In S1 (Model 3) shows that the proportional odds of children aged 24-35 months cohabiting with '2 or more diseases' versus combined of '0/1 disease' and living in the wealthiest households were significantly 0.66 lower than the odds for children aged 24-35 months and reside in poorest households when other covariates are held constant. Similarly, the proportional odds of children who are aged 34-47 months and live in the middle, richer, and richest household wealth quintiles were statistically significantly 0.59 (95% CI: 0.35-0.99), 0.49 (95% CI: 0.29-0.83), and 0.21 (95% CI: 0.12-0.36), respectively times the odds of contracting '2 or more diseases' versus combining of '0/1 disease' when compared with children aged 34-47 months and live in poorest household wealth quintile. Also, the two-way interactions between a child's age and wealth status reveal that children aged 48-59 months from the middle and richest classes have reduced statistically significantly proportional odds of 0.42 and 0.73, respectively, of being sick of '2 or more diseases' versus combined odds of '0/1 disease' when compared with children aged 48-59 months and live in the poorest household wealth quintile relative to the model 10 covariates.*

*However, model 4, which includes the covariates and all the possible two-way interactions between a child's sex, age, and wealth status, did not show any more improvement in the significant effects of the child's age and wealth status over what was attained in model 3. Furthermore, the three-way interaction between a child's sex, age and wealth status considered in model 5 did not yield any significant effects on children contracting '2 or more diseases' versus combining '0/1 disease' when compared with their respective reference categories conditional all the covariates in model 4.*

*S1: Multivariate analysis of Interactions between child's age, sex, and household wealth status accounting for other covariates*

|                              | Additive Model containing only the principal predictors (Child's sex, age and wealth status) N=7794 |         |             | Child's sex * wealth status and all covariates N=7794 |         |             | Child's sex* age and all covariates N=7794 |         |             | Child's age* wealth status and all covariates N=7794 |         |             | Child's sex * wealth status + child's sex * age + child's age * wealth status + all the covariates N=7794 |         |             | Child's sex* age* wealth + all the covariates N=7794 |         |             |
|------------------------------|-----------------------------------------------------------------------------------------------------|---------|-------------|-------------------------------------------------------|---------|-------------|--------------------------------------------|---------|-------------|------------------------------------------------------|---------|-------------|-----------------------------------------------------------------------------------------------------------|---------|-------------|------------------------------------------------------|---------|-------------|
|                              | Model 1                                                                                             |         |             | Model 2                                               |         |             | Model 3                                    |         |             | Model 4                                              |         |             | Model 5                                                                                                   |         |             |                                                      |         |             |
|                              | AOR                                                                                                 | p-value | 95% CI      | AOR                                                   | p-value | 95% CI      | AOR                                        | p-value | 95% CI      | AOR                                                  | p-value | 95% CI      | AOR                                                                                                       | p-value | 95% CI      | AOR                                                  | p-value | 95% CI      |
| Child's sex                  |                                                                                                     |         |             |                                                       |         |             |                                            |         |             |                                                      |         |             |                                                                                                           |         |             |                                                      |         |             |
| Male                         | 1.00                                                                                                |         |             | 1.00                                                  |         |             | 1.00                                       |         |             | 1.00                                                 |         |             | 1.00                                                                                                      |         |             | 1.00                                                 |         |             |
| Female                       | 0.73                                                                                                | <0.001  | (0.67-0.80) | 0.66                                                  | 0.001   | (0.52-0.84) | 0.70                                       | 0.005   | (0.55-0.9)  | 0.73                                                 | <0.001  | (0.67-0.8)  | 0.65                                                                                                      | 0.01    | (0.47-0.9)  | 0.73                                                 | 0.31    | (0.4-1.35)  |
| Child's age in group         |                                                                                                     |         |             |                                                       |         |             |                                            |         |             |                                                      |         |             |                                                                                                           |         |             |                                                      |         |             |
| 6-11 months                  | 1.00                                                                                                |         |             | 1.00                                                  |         |             | 1.00                                       |         |             | 1.00                                                 |         |             | 1.00                                                                                                      |         |             | 1.00                                                 |         |             |
| 12-23 months                 | 1.39                                                                                                | <0.001  | (1.18-1.65) | 1.39                                                  | <0.001  | (1.17-1.65) | 1.47                                       | 0.001   | (1.17-1.85) | 1.56                                                 | 0.022   | (1.07-2.28) | 1.65                                                                                                      | 0.02    | (1.08-2.51) | 1.83                                                 | 0.04    | (1.03-3.24) |
| 24-35 months                 | 1.25                                                                                                | 0.05    | (1.00-1.57) | 1.25                                                  | 0.055   | (0.99-1.56) | 1.20                                       | 0.209   | (0.9-1.59)  | 2.00                                                 | 0.003   | (1.27-3.18) | 1.94                                                                                                      | 0.01    | (1.18-3.18) | 2.96                                                 | 0.00    | (1.45-6.04) |
| 36-47 months                 | 1.1                                                                                                 | 0.41    | (0.88-1.38) | 1.10                                                  | 0.429   | (0.87-1.38) | 1.07                                       | 0.634   | (0.81-1.42) | 2.06                                                 | 0.001   | (1.33-3.18) | 2.02                                                                                                      | 0.00    | (1.26-3.25) | 1.89                                                 | 0.05    | (1-3.57)    |
| 48-59 months                 | 0.87                                                                                                | 0.24    | (0.69-1.10) | 0.87                                                  | 0.231   | (0.69-1.09) | 0.81                                       | 0.14    | (0.61-1.07) | 1.51                                                 | 0.064   | (0.98-2.34) | 1.40                                                                                                      | 0.16    | (0.87-2.24) | 1.36                                                 | 0.32    | (0.74-2.52) |
| Household wealth index       |                                                                                                     |         |             |                                                       |         |             |                                            |         |             |                                                      |         |             |                                                                                                           |         |             |                                                      |         |             |
| Poorest                      | 1.00                                                                                                |         |             | 1.00                                                  |         |             | 1.00                                       |         |             | 1.00                                                 |         |             | 1.00                                                                                                      |         |             | 1.00                                                 |         |             |
| Poorer                       | 0.86                                                                                                | 0.12    | (0.72-1.04) | 0.87                                                  | 0.3     | (0.68-1.13) | 0.86                                       | 0.114   | (0.72-1.04) | 0.77                                                 | 0.207   | (0.51-1.16) | 0.77                                                                                                      | 0.26    | (0.49-1.21) | 0.88                                                 | 0.68    | (0.47-1.63) |
| Middle                       | 0.69                                                                                                | <0.001  | (0.56-0.86) | 0.63                                                  | 0.001   | (0.49-0.83) | 0.69                                       | 0.001   | (0.56-0.86) | 0.97                                                 | 0.874   | (0.64-1.47) | 0.88                                                                                                      | 0.58    | (0.56-1.38) | 0.93                                                 | 0.81    | (0.51-1.69) |
| Richer                       | 0.56                                                                                                | <0.001  | (0.44-0.72) | 0.53                                                  | <0.001  | (0.4-0.71)  | 0.56                                       | <0.001  | (0.44-0.71) | 0.82                                                 | 0.379   | (0.53-1.27) | 0.77                                                                                                      | 0.29    | (0.48-1.24) | 0.78                                                 | 0.43    | (0.42-1.44) |
| Richest                      | 0.38                                                                                                | <0.001  | (0.29-0.50) | 0.34                                                  | <0.001  | (0.24-0.47) | 0.38                                       | <0.001  | (0.29-0.5)  | 0.94                                                 | 0.802   | (0.59-1.51) | 0.82                                                                                                      | 0.45    | (0.5-1.36)  | 0.97                                                 | 0.92    | (0.5-1.87)  |
| <b>Interaction effects</b>   |                                                                                                     |         |             |                                                       |         |             |                                            |         |             |                                                      |         |             |                                                                                                           |         |             |                                                      |         |             |
| <b>Sex and wealth status</b> |                                                                                                     |         |             |                                                       |         |             |                                            |         |             |                                                      |         |             |                                                                                                           |         |             |                                                      |         |             |
|                              |                                                                                                     |         |             | 1.00                                                  |         |             |                                            |         |             |                                                      |         |             | 1.00                                                                                                      |         |             | 1.00                                                 |         |             |
| Female and poorer            |                                                                                                     |         |             | 0.97                                                  | 0.877   | (0.7-1.35)  |                                            |         |             |                                                      |         |             | 0.97                                                                                                      | 0.85    | (0.7-1.35)  | 0.77                                                 | 0.52    | (0.34-1.74) |
| Female and middle            |                                                                                                     |         |             | 1.19                                                  | 0.276   | (0.87-1.62) |                                            |         |             |                                                      |         |             | 1.18                                                                                                      | 0.30    | (0.86-1.61) | 1.08                                                 | 0.85    | (0.49-2.37) |
| Female and richer            |                                                                                                     |         |             | 1.11                                                  | 0.514   | (0.81-1.51) |                                            |         |             |                                                      |         |             | 1.10                                                                                                      | 0.53    | (0.81-1.5)  | 1.12                                                 | 0.79    | (0.51-2.45) |
| Female and richest           |                                                                                                     |         |             | 1.25                                                  | 0.167   | (0.91-1.72) |                                            |         |             |                                                      |         |             | 1.28                                                                                                      | 0.13    | (0.93-1.76) | 0.94                                                 | 0.88    | (0.41-2.16) |
| <b>Sex and age</b>           |                                                                                                     |         |             |                                                       |         |             |                                            |         |             |                                                      |         |             |                                                                                                           |         |             |                                                      |         |             |
|                              |                                                                                                     |         |             |                                                       |         |             | 1.00                                       |         |             |                                                      |         |             |                                                                                                           |         |             | 1.00                                                 |         |             |
| Female and 12-23 months      |                                                                                                     |         |             |                                                       |         |             | 0.90                                       | 0.488   | (0.66-1.22) |                                                      |         |             | 0.88                                                                                                      | 0.42    | (0.65-1.2)  | 0.73                                                 | 0.42    | (0.34-1.57) |
| Female and 24-35 months      |                                                                                                     |         |             |                                                       |         |             | 1.10                                       | 0.561   | (0.8-1.52)  |                                                      |         |             | 1.07                                                                                                      | 0.69    | (0.77-1.48) | 0.52                                                 | 0.15    | (0.21-1.27) |
| Female and 36-47 months      |                                                                                                     |         |             |                                                       |         |             | 1.06                                       | 0.702   | (0.77-1.46) |                                                      |         |             | 1.04                                                                                                      | 0.82    | (0.75-1.43) | 1.17                                                 | 0.71    | (0.52-2.64) |
| Female and 48-59 months      |                                                                                                     |         |             |                                                       |         |             | 1.18                                       | 0.32    | (0.85-1.62) |                                                      |         |             | 1.15                                                                                                      | 0.38    | (0.84-1.58) | 1.23                                                 | 0.61    | (0.55-2.76) |
| <b>Age and wealth status</b> |                                                                                                     |         |             |                                                       |         |             |                                            |         |             |                                                      |         |             |                                                                                                           |         |             |                                                      |         |             |
| 12-23 months and poorer      |                                                                                                     |         |             |                                                       |         |             |                                            |         |             | 1.38                                                 | 0.23    | (0.82-2.32) | 1.39                                                                                                      | 0.22    | (0.82-2.33) | 1.12                                                 | 0.78    | (0.52-2.4)  |
| 12-23 months and middle      |                                                                                                     |         |             |                                                       |         |             |                                            |         |             | 0.9                                                  | 0.67    | (0.54-1.48) | 0.91                                                                                                      | 0.70    | (0.55-1.5)  | 0.86                                                 | 0.70    | (0.41-1.81) |
| 12-23 months and richer      |                                                                                                     |         |             |                                                       |         |             |                                            |         |             | 0.84                                                 | 0.499   | (0.51-1.39) | 0.84                                                                                                      | 0.51    | (0.51-1.39) | 0.91                                                 | 0.79    | (0.44-1.87) |
| 12-23 months and richest     |                                                                                                     |         |             |                                                       |         |             |                                            |         |             | 0.63                                                 | 0.08    | (0.37-1.06) | 0.64                                                                                                      | 0.09    | (0.38-1.08) | 0.44                                                 | 0.04    | (0.21-0.96) |
| 24-35 months and poorer      |                                                                                                     |         |             |                                                       |         |             |                                            |         |             | 1.08                                                 | 0.80    | (0.61-1.92) | 1.08                                                                                                      | 0.78    | (0.61-1.93) | 0.65                                                 | 0.35    | (0.27-1.59) |
| 24-35 months and middle      |                                                                                                     |         |             |                                                       |         |             |                                            |         |             | 0.64                                                 | 0.11    | (0.37-1.1)  | 0.64                                                                                                      | 0.11    | (0.37-1.11) | 0.38                                                 | 0.02    | (0.16-0.88) |
| 24-35 months and richer      |                                                                                                     |         |             |                                                       |         |             |                                            |         |             | 0.61                                                 | 0.078   | (0.36-1.06) | 0.62                                                                                                      | 0.08    | (0.36-1.06) | 0.42                                                 | 0.04    | (0.18-0.96) |
| 24-35 months and richest     |                                                                                                     |         |             |                                                       |         |             |                                            |         |             | 0.34                                                 | 0.00    | (0.19-0.6)  | 0.34                                                                                                      | 0.00    | (0.19-0.6)  | 0.20                                                 | 0.01    | (0.08-0.48) |
| 36-47 months and poorer      |                                                                                                     |         |             |                                                       |         |             |                                            |         |             | 1.13                                                 | 0.67    | (0.65-1.94) | 1.13                                                                                                      | 0.65    | (0.66-1.95) | 1.23                                                 | 0.62    | (0.54-2.81) |

|                                         |             |              |                    |             |             |                    |             |             |                    |
|-----------------------------------------|-------------|--------------|--------------------|-------------|-------------|--------------------|-------------|-------------|--------------------|
| <i>36-47 months and middle</i>          | <i>0.59</i> | <i>0.05</i>  | <i>(0.35-0.99)</i> | <i>0.59</i> | <i>0.05</i> | <i>(0.35-0.99)</i> | <i>0.64</i> | <i>0.25</i> | <i>(0.29-1.37)</i> |
| <i>36-47 months and richer</i>          | <i>0.49</i> | <i>0.007</i> | <i>(0.29-0.83)</i> | <i>0.49</i> | <i>0.01</i> | <i>(0.29-0.83)</i> | <i>0.50</i> | <i>0.08</i> | <i>(0.23-1.09)</i> |
| <i>36-47 months and richest</i>         | <i>0.21</i> | <i>0.00</i>  | <i>(0.12-0.36)</i> | <i>0.21</i> | <i>0.00</i> | <i>(0.12-0.36)</i> | <i>0.25</i> | <i>0.01</i> | <i>(0.11-0.56)</i> |
| <i>48-59 months and poorer</i>          | <i>1.03</i> | <i>0.92</i>  | <i>(0.6-1.77)</i>  | <i>1.03</i> | <i>0.90</i> | <i>(0.6-1.78)</i>  | <i>0.96</i> | <i>0.92</i> | <i>(0.44-2.12)</i> |
| <i>48-59 months and middle</i>          | <i>0.58</i> | <i>0.04</i>  | <i>(0.35-0.98)</i> | <i>0.59</i> | <i>0.05</i> | <i>(0.35-0.99)</i> | <i>0.67</i> | <i>0.29</i> | <i>(0.31-1.42)</i> |
| <i>48-59 months and richer</i>          | <i>0.60</i> | <i>0.051</i> | <i>(0.36-1)</i>    | <i>0.60</i> | <i>0.06</i> | <i>(0.36-1.01)</i> | <i>0.68</i> | <i>0.30</i> | <i>(0.32-1.42)</i> |
| <i>48-59 months and richest</i>         | <i>0.27</i> | <i>0.00</i>  | <i>(0.16-0.47)</i> | <i>0.27</i> | <i>0.00</i> | <i>(0.16-0.47)</i> | <i>0.25</i> | <i>0.01</i> | <i>(0.11-0.54)</i> |
|                                         |             |              |                    |             |             |                    |             |             |                    |
| <i>Sex, age and wealth status</i>       |             |              |                    |             |             |                    |             |             |                    |
| <i>Female, 12-23 months and poorer</i>  |             |              |                    |             |             |                    | <i>1.50</i> | <i>0.44</i> | <i>(0.53-4.27)</i> |
| <i>Female, 12-23 months and middle</i>  |             |              |                    |             |             |                    | <i>1.08</i> | <i>0.88</i> | <i>(0.4-2.96)</i>  |
| <i>Female, 12-23 months and richer</i>  |             |              |                    |             |             |                    | <i>0.82</i> | <i>0.69</i> | <i>(0.3-2.21)</i>  |
| <i>Female, 12-23 months and richest</i> |             |              |                    |             |             |                    | <i>2.03</i> | <i>0.18</i> | <i>(0.72-5.74)</i> |
| <i>Female, 24-35 months and poorer</i>  |             |              |                    |             |             |                    | <i>2.40</i> | <i>0.15</i> | <i>(0.74-7.78)</i> |
| <i>Female, 24-35 months and middle</i>  |             |              |                    |             |             |                    | <i>2.47</i> | <i>0.11</i> | <i>(0.81-7.5)</i>  |
| <i>Female, 24-35 months and richer</i>  |             |              |                    |             |             |                    | <i>1.87</i> | <i>0.27</i> | <i>(0.62-5.65)</i> |
| <i>Female, 24-35 months and richest</i> |             |              |                    |             |             |                    | <i>2.49</i> | <i>0.12</i> | <i>(0.79-7.86)</i> |
| <i>Female, 36-47 months and poorer</i>  |             |              |                    |             |             |                    | <i>0.87</i> | <i>0.81</i> | <i>(0.29-2.64)</i> |
| <i>Female, 36-47 months and middle</i>  |             |              |                    |             |             |                    | <i>0.88</i> | <i>0.81</i> | <i>(0.31-2.51)</i> |
| <i>Female, 36-47 months and richer</i>  |             |              |                    |             |             |                    | <i>0.96</i> | <i>0.94</i> | <i>(0.34-2.73)</i> |
| <i>Female, 36-47 months and richest</i> |             |              |                    |             |             |                    | <i>0.75</i> | <i>0.60</i> | <i>(0.25-2.25)</i> |
| <i>Female, 48-59 months and poorer</i>  |             |              |                    |             |             |                    | <i>1.13</i> | <i>0.83</i> | <i>(0.38-3.36)</i> |
| <i>Female, 48-59 months and middle</i>  |             |              |                    |             |             |                    | <i>0.76</i> | <i>0.61</i> | <i>(0.27-2.16)</i> |
| <i>Female, 48-59 months and richer</i>  |             |              |                    |             |             |                    | <i>0.77</i> | <i>0.63</i> | <i>(0.27-2.18)</i> |
| <i>Female, 48-59 months and richest</i> |             |              |                    |             |             |                    | <i>1.21</i> | <i>0.73</i> | <i>(0.41-3.57)</i> |
